# Supplementary material for: Long-Term Leaching Effects on CaO-Modified Iron Silicate Slag
Source: MDPI journal article supplement (doi:10.3390/min12111442), 2022-11-14
Supplement: s1 [file s1]

Archive with 1 entries (1 files):
- minerals-1978296-supplementary.pdf
