# Supplementary material for: Long-Term Leaching Effects on CaO-Modified Iron Silicate Slag
Source: MDPI journal article supplement (doi:10.3390/min12111442), 2022-11-14
Supplement: s1 [file s1 › minerals-1978296-supplementary.pdf]

### Supplementary Materials

The duplicate leaching data for F06 from the dynamic leaching test are presented in Figure S1.

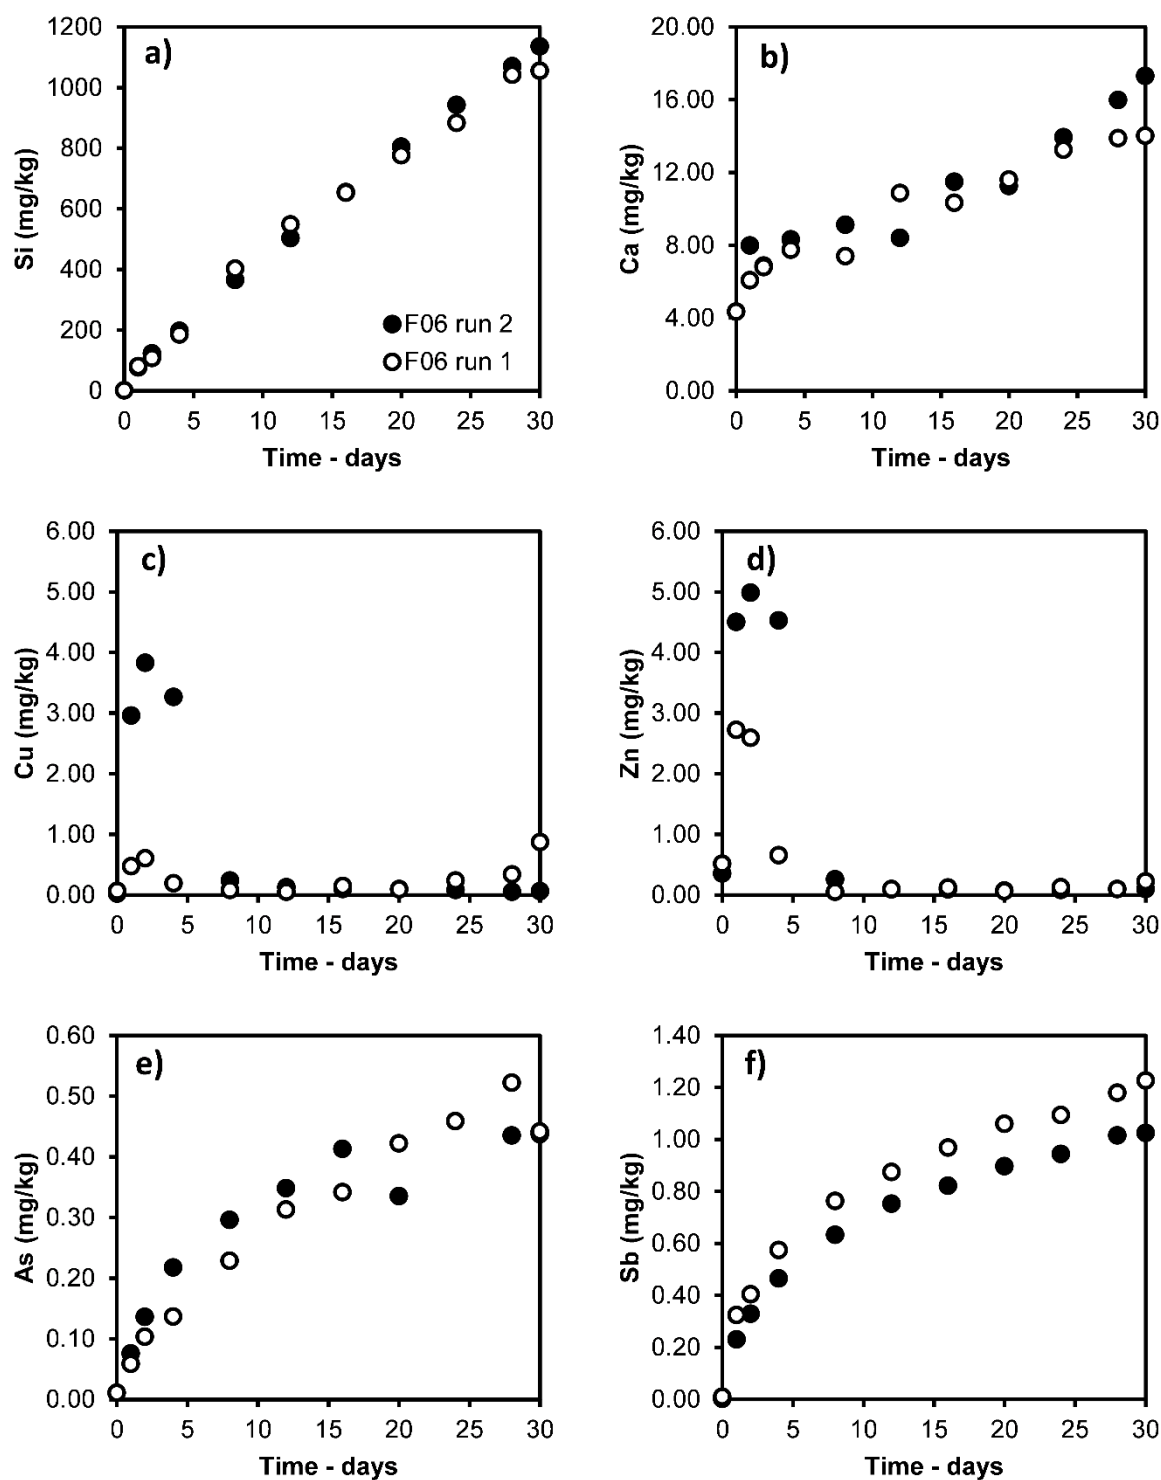

**Figure S1.** Leaching data of F06, duplicate runs: (a) Si, (b) Ca, (c) Zn, (d) Cu, (e) As, (f) Sb.
